# Supplementary material
Source: publisher figshare collection journal article supplement (https://acs.figshare.com/ndownloader/files/4527673)
Supplement: Supplementary file 1 [file 4527673]

data_compound-1

_journal_name_full               'Inorganic Chemistry '

_journal_coden_Cambridge         ?
_publ_contact_author_name        'Prof Xiao-Ying Huang'
_publ_contact_author_address     
;
State Key Laboratory of Structural Chemistry
Fujian Institute of Research on the Structure of Matter
Chinese Academy of Sciences
Fuzhou, Fujian 350002
P. R. CHINA
;
_publ_contact_author_email       xyhuang@fjirsm.ac.cn
_publ_contact_author_phone       86-59183793727
_publ_contact_author_fax         86-59183793727
loop_
_publ_author_name
_publ_author_address
'Mei-Ling Feng'
;
State Key Laboratory of Structural Chemistry
Fujian Institute of Research on the Structure of Matter
Chinese Academy of Sciences
Fuzhou, Fujian 350002
P. R. CHINA
;
'Dong Ye'
;
State Key Lab of Structural Chemistry
Fujian Institute of Reseach on the Structure of Matter, Chinese Academy
of Sciences
Fuzhou, Fujian 350002
P. R. CHINA
;
'Xiao-Ying Huang'
;
State Key Lab of Structural Chemistry
Fujian Institute of Reseach on the Structure of Matter, Chinese Academy
of Sciences
Fuzhou
350002
P. R. CHINA
;

_publ_section_title              
;
The first quaternary tin(IV) antimony(III) sulfide decorated with
lanthanum(III) ethylenediamine complexes: [La(en)4SbSnS5]2.0.5H2O
;
 
_audit_creation_method            SHELXL-97 
_chemical_name_systematic 
; 
 ? 
; 
_chemical_name_common             ? 
_chemical_melting_point           ? 
_chemical_formula_moiety          'C16 H64 La2 N16 S10 Sb2 Sn2, 0.5(H2 O)' 
_chemical_formula_sum 
 'C16 H65 La2 N16 O0.50 S10 Sb2 Sn2' 
_chemical_formula_weight          1569.14 
 
loop_ 
 _atom_type_symbol 
 _atom_type_description 
 _atom_type_scat_dispersion_real 
 _atom_type_scat_dispersion_imag 
 _atom_type_scat_source 
 'C'  'C'   0.0033   0.0016 
 'International Tables Vol C Tables 4.2.6.8 and 6.1.1.4' 
 'H'  'H'   0.0000   0.0000 
 'International Tables Vol C Tables 4.2.6.8 and 6.1.1.4' 
 'N'  'N'   0.0061   0.0033 
 'International Tables Vol C Tables 4.2.6.8 and 6.1.1.4' 
 'O'  'O'   0.0106   0.0060 
 'International Tables Vol C Tables 4.2.6.8 and 6.1.1.4' 
 'S'  'S'   0.1246   0.1234 
 'International Tables Vol C Tables 4.2.6.8 and 6.1.1.4' 
 'Sn'  'Sn'  -0.6537   1.4246 
 'International Tables Vol C Tables 4.2.6.8 and 6.1.1.4' 
 'Sb'  'Sb'  -0.5866   1.5461 
 'International Tables Vol C Tables 4.2.6.8 and 6.1.1.4' 
 'La'  'La'  -0.2871   2.4523 
 'International Tables Vol C Tables 4.2.6.8 and 6.1.1.4' 
 
_symmetry_cell_setting            monoclinic 
_symmetry_space_group_name_H-M    'P 21/n'
_symmetry_space_group_name_Hall    '-P 2yn'
 
loop_ 
 _symmetry_equiv_pos_as_xyz 
 'x, y, z' 
 '-x+1/2, y+1/2, -z+1/2' 
 '-x, -y, -z' 
 'x-1/2, -y-1/2, z-1/2' 
 
_cell_length_a                    10.801(4) 
_cell_length_b                    16.336(5) 
_cell_length_c                    14.311(5) 
_cell_angle_alpha                 90.00 
_cell_angle_beta                  99.107(7) 
_cell_angle_gamma                 90.00 
_cell_volume                      2493.3(14) 
_cell_formula_units_Z             2 
_cell_measurement_temperature     293(2) 
_cell_measurement_reflns_used     6268 
_cell_measurement_theta_min       3.1409 
_cell_measurement_theta_max       27.4758
 
_exptl_crystal_description        Prismatic 
_exptl_crystal_colour             Orange 
_exptl_crystal_size_max           0.35 
_exptl_crystal_size_mid           0.20 
_exptl_crystal_size_min           0.12 
_exptl_crystal_density_meas       ? 
_exptl_crystal_density_diffrn     2.090 
_exptl_crystal_density_method     'not measured' 
_exptl_crystal_F_000              1506 
_exptl_absorpt_coefficient_mu     4.182 
_exptl_absorpt_correction_type    Multi-scan 
_exptl_absorpt_correction_T_min   0.211 
_exptl_absorpt_correction_T_max   0.605 
_exptl_absorpt_process_details    'CrystalClear (Rigaku/MSC Inc., 2005)' 
 
_exptl_special_details 
; 
 ? 
; 
 
_diffrn_ambient_temperature       293(2) 
_diffrn_radiation_wavelength      0.71073 
_diffrn_radiation_type            MoK\a 
_diffrn_radiation_source          'fine-focus sealed tube' 
_diffrn_radiation_monochromator   graphite 
_diffrn_measurement_device_type   'Mercury70 (2x2 bin mode)' 
_diffrn_measurement_method        'CCD_Profile_fitting' 
_diffrn_detector_area_resol_mean  14.6306  
_diffrn_standards_number          ? 
_diffrn_standards_interval_count  ? 
_diffrn_standards_interval_time   ? 
_diffrn_standards_decay_%         ? 
_diffrn_reflns_number             18847 
_diffrn_reflns_av_R_equivalents   0.0573 
_diffrn_reflns_av_sigmaI/netI     0.0555 
_diffrn_reflns_limit_h_min        -8 
_diffrn_reflns_limit_h_max        14 
_diffrn_reflns_limit_k_min        -20 
_diffrn_reflns_limit_k_max        21 
_diffrn_reflns_limit_l_min        -18 
_diffrn_reflns_limit_l_max        18 
_diffrn_reflns_theta_min          2.28 
_diffrn_reflns_theta_max          27.49 
_reflns_number_total              5698 
_reflns_number_gt                 5002 
_reflns_threshold_expression      >2sigma(I) 
 
_computing_data_collection        'CrystalClear (Rigaku/MSC Inc., 2005)' 
_computing_cell_refinement        'CrystalClear (Rigaku/MSC Inc., 2005)' 
_computing_data_reduction         'CrystalClear (Rigaku/MSC Inc., 2005)' 
_computing_structure_solution     'SHELXS-97 (Sheldrick, 1990)' 
_computing_structure_refinement   'SHELXL-97 (Sheldrick, 1997)' 
_computing_molecular_graphics     'Diamond 3.0' 
_computing_publication_material   'Windows Word 2003' 
 
_refine_special_details 
; 
 Refinement of F^2^ against ALL reflections.  The weighted R-factor wR and 
 goodness of fit S are based on F^2^, conventional R-factors R are based 
 on F, with F set to zero for negative F^2^. The threshold expression of 
 F^2^ > 2sigma(F^2^) is used only for calculating R-factors(gt) etc. and is 
 not relevant to the choice of reflections for refinement.  R-factors based 
 on F^2^ are statistically about twice as large as those based on F, and R- 
 factors based on ALL data will be even larger. 
; 
 
_refine_ls_structure_factor_coef  Fsqd  
_refine_ls_matrix_type            full 
_refine_ls_weighting_scheme       calc  
_refine_ls_weighting_details 
 'calc w=1/[\s^2^(Fo^2^)+(0.0396P)^2^+0.8000P] where P=(Fo^2^+2Fc^2^)/3' 
_atom_sites_solution_primary      direct 
_atom_sites_solution_secondary    difmap 
_atom_sites_solution_hydrogens    geom 
_refine_ls_hydrogen_treatment     constr 
_refine_ls_extinction_method      none 
_refine_ls_extinction_coef        ? 
_refine_ls_number_reflns          5698 
_refine_ls_number_parameters      245 
_refine_ls_number_restraints      0 
_refine_ls_R_factor_all           0.0518 
_refine_ls_R_factor_gt            0.0440 
_refine_ls_wR_factor_ref          0.1027 
_refine_ls_wR_factor_gt           0.0968 
_refine_ls_goodness_of_fit_ref    1.127 
_refine_ls_restrained_S_all       1.127 
_refine_ls_shift/su_max           0.001 
_refine_ls_shift/su_mean          0.000 
 
loop_ 
 _atom_site_label 
 _atom_site_type_symbol 
 _atom_site_fract_x 
 _atom_site_fract_y 
 _atom_site_fract_z 
 _atom_site_U_iso_or_equiv 
 _atom_site_adp_type 
 _atom_site_occupancy 
 _atom_site_symetry_multiplicity 
 _atom_site_calc_flag 
 _atom_site_refinement_flags 
 _atom_site_disorder_assembly 
 _atom_site_disorder_group 
La1 La 0.00624(3) 0.278348(18) 0.55341(2) 0.02534(10) Uani 1 1 d . . . 
Sb1 Sb 0.59090(3) 0.61188(2) 0.57861(3) 0.02855(11) Uani 1 1 d . . . 
Sn1 Sn 0.35343(3) 0.45896(2) 0.65547(2) 0.02512(11) Uani 1 1 d . . . 
S1 S 0.35864(16) 0.42036(10) 0.81223(11) 0.0412(4) Uani 1 1 d . A . 
S2 S 0.51920(14) 0.39275(10) 0.58702(11) 0.0356(3) Uani 1 1 d . . . 
S3 S 0.17036(13) 0.42894(9) 0.54681(10) 0.0307(3) Uani 1 1 d . A . 
S4 S 0.39367(14) 0.60609(8) 0.65153(11) 0.0317(3) Uani 1 1 d . A . 
S5 S 0.61317(15) 0.75359(9) 0.59814(11) 0.0389(4) Uani 1 1 d . . . 
N1 N 0.0572(5) 0.1110(3) 0.5433(4) 0.0430(13) Uani 1 1 d . A . 
H1A H 0.0377 0.0859 0.5950 0.052 Uiso 1 1 calc R . . 
H1B H 0.0088 0.0895 0.4923 0.052 Uiso 1 1 calc R . . 
N2 N 0.2452(4) 0.2301(3) 0.6022(4) 0.0384(12) Uani 1 1 d . A . 
H2A H 0.2887 0.2487 0.5579 0.046 Uiso 1 1 calc R . . 
H2B H 0.2764 0.2551 0.6570 0.046 Uiso 1 1 calc R . . 
C1 C 0.1903(6) 0.0955(4) 0.5370(5) 0.0474(17) Uani 1 1 d . . . 
H1C H 0.2083 0.1131 0.4759 0.057 Uiso 1 1 calc R A . 
H1D H 0.2080 0.0374 0.5437 0.057 Uiso 1 1 calc R . . 
C2 C 0.2707(6) 0.1419(4) 0.6143(5) 0.0466(16) Uani 1 1 d . A . 
H2C H 0.2527 0.1241 0.6755 0.056 Uiso 1 1 calc R . . 
H2D H 0.3585 0.1312 0.6120 0.056 Uiso 1 1 calc R . . 
N3 N 0.0573(4) 0.3308(3) 0.7350(3) 0.0343(11) Uani 1 1 d . A . 
H3A H 0.0334 0.2921 0.7731 0.041 Uiso 1 1 calc R . . 
H3B H 0.1407 0.3376 0.7509 0.041 Uiso 1 1 calc R . . 
N4 N -0.1522(5) 0.3933(3) 0.6023(4) 0.0380(12) Uani 1 1 d . A . 
H4A H -0.1375 0.4408 0.5740 0.046 Uiso 1 1 calc R . . 
H4B H -0.2313 0.3781 0.5796 0.046 Uiso 1 1 calc R . . 
C3 C -0.0061(6) 0.4085(4) 0.7508(5) 0.0466(16) Uani 1 1 d . . . 
H3C H 0.0365 0.4533 0.7248 0.056 Uiso 1 1 calc R A . 
H3D H -0.0007 0.4177 0.8183 0.056 Uiso 1 1 calc R . . 
C4 C -0.1422(6) 0.4080(4) 0.7056(4) 0.0415(15) Uani 1 1 d . A . 
H4C H -0.1866 0.3653 0.7339 0.050 Uiso 1 1 calc R . . 
H4D H -0.1804 0.4601 0.7165 0.050 Uiso 1 1 calc R . . 
N5 N 0.0681(5) 0.2341(3) 0.3827(3) 0.0360(11) Uani 1 1 d . A . 
H5A H 0.1522 0.2351 0.3878 0.043 Uiso 1 1 calc R . . 
H5B H 0.0434 0.1820 0.3710 0.043 Uiso 1 1 calc R . . 
N6 N -0.0694(5) 0.3779(3) 0.4049(4) 0.0370(11) Uani 1 1 d . A . 
H6A H -0.1497 0.3662 0.3812 0.044 Uiso 1 1 calc R . . 
H6B H -0.0666 0.4300 0.4254 0.044 Uiso 1 1 calc R . . 
C5 C 0.0161(8) 0.2837(4) 0.3010(5) 0.0539(19) Uani 1 1 d . . . 
H5C H -0.0670 0.2639 0.2754 0.065 Uiso 1 1 calc R A . 
H5D H 0.0685 0.2784 0.2522 0.065 Uiso 1 1 calc R . . 
C6 C 0.0086(7) 0.3703(4) 0.3276(4) 0.0501(17) Uani 1 1 d . A . 
H6C H -0.0287 0.4021 0.2731 0.060 Uiso 1 1 calc R . . 
H6D H 0.0922 0.3915 0.3492 0.060 Uiso 1 1 calc R . . 
N7A N -0.1350(5) 0.1923(3) 0.6612(4) 0.0479(14) Uani 0.61(2) 1 d P A 1 
H7A H -0.1018 0.1420 0.6720 0.057 Uiso 0.61(2) 1 calc PR A 1 
H7B H -0.1318 0.2175 0.7175 0.057 Uiso 0.61(2) 1 calc PR A 1 
N8A N -0.2182(5) 0.2209(3) 0.4653(4) 0.0405(12) Uani 0.61(2) 1 d P A 1 
H8A H -0.2710 0.2637 0.4543 0.049 Uiso 0.61(2) 1 calc PR A 1 
H8B H -0.2071 0.2008 0.4087 0.049 Uiso 0.61(2) 1 calc PR A 1 
C7A C -0.2752(13) 0.1838(10) 0.6139(10) 0.052(5) Uani 0.61(2) 1 d P A 1 
H7C H -0.3167 0.1425 0.6466 0.062 Uiso 0.61(2) 1 calc PR A 1 
H7D H -0.3185 0.2354 0.6173 0.062 Uiso 0.61(2) 1 calc PR A 1 
C8A C -0.2783(13) 0.1595(9) 0.5126(10) 0.039(3) Uani 0.61(2) 1 d P A 1 
H8C H -0.2356 0.1076 0.5094 0.047 Uiso 0.61(2) 1 calc PR A 1 
H8D H -0.3645 0.1531 0.4820 0.047 Uiso 0.61(2) 1 calc PR A 1 
N7B N -0.1350(5) 0.1923(3) 0.6612(4) 0.0479(14) Uani 0.39(2) 1 d P A 2 
H7E H -0.0829 0.1663 0.7070 0.057 Uiso 0.39(2) 1 calc PR A 2 
H7F H -0.1803 0.2281 0.6896 0.057 Uiso 0.39(2) 1 calc PR A 2 
N8B N -0.2182(5) 0.2209(3) 0.4653(4) 0.0405(12) Uani 0.39(2) 1 d P A 2 
H8E H -0.2601 0.2616 0.4316 0.049 Uiso 0.39(2) 1 calc PR A 2 
H8F H -0.2051 0.1809 0.4248 0.049 Uiso 0.39(2) 1 calc PR A 2 
C7B C -0.2210(18) 0.1316(12) 0.6107(13) 0.045(6) Uani 0.39(2) 1 d P A 2 
H7G H -0.2685 0.1036 0.6531 0.054 Uiso 0.39(2) 1 calc PR A 2 
H7H H -0.1765 0.0916 0.5784 0.054 Uiso 0.39(2) 1 calc PR A 2 
C8B C -0.304(2) 0.1850(17) 0.542(2) 0.054(7) Uani 0.39(2) 1 d P A 2 
H8G H -0.3375 0.2297 0.5745 0.065 Uiso 0.39(2) 1 calc PR A 2 
H8H H -0.3737 0.1533 0.5088 0.065 Uiso 0.39(2) 1 calc PR A 2 
O1 O 0.6363(19) 0.5036(12) 0.8345(14) 0.059(5) Uani 0.25 1 d P . . 
H1E H 0.5880 0.4800 0.8686 0.089 Uiso 0.25 1 d PR . . 
H1F H 0.5813 0.5266 0.7927 0.089 Uiso 0.25 1 d PR . . 
 
loop_ 
 _atom_site_aniso_label 
 _atom_site_aniso_U_11 
 _atom_site_aniso_U_22 
 _atom_site_aniso_U_33 
 _atom_site_aniso_U_23 
 _atom_site_aniso_U_13 
 _atom_site_aniso_U_12 
La1 0.02101(19) 0.02757(18) 0.02563(17) 0.00112(11) -0.00184(13) -0.00056(11) 
Sb1 0.0217(2) 0.0339(2) 0.0293(2) -0.00256(15) 0.00173(15) -0.00247(14) 
Sn1 0.0214(2) 0.0281(2) 0.0247(2) -0.00153(14) -0.00008(15) -0.00122(14) 
S1 0.0436(10) 0.0508(10) 0.0279(7) 0.0084(7) 0.0013(6) 0.0016(7) 
S2 0.0244(8) 0.0455(8) 0.0348(8) -0.0092(6) -0.0021(6) 0.0075(6) 
S3 0.0244(7) 0.0323(7) 0.0322(7) 0.0006(6) -0.0049(5) -0.0058(6) 
S4 0.0259(8) 0.0293(7) 0.0411(8) -0.0037(6) 0.0089(6) -0.0035(6) 
S5 0.0399(9) 0.0364(8) 0.0422(9) -0.0114(7) 0.0125(7) -0.0120(7) 
N1 0.042(3) 0.037(3) 0.050(3) 0.006(2) 0.004(3) -0.003(2) 
N2 0.026(3) 0.046(3) 0.041(3) 0.005(2) -0.001(2) 0.002(2) 
C1 0.049(4) 0.040(4) 0.054(4) 0.004(3) 0.012(3) 0.012(3) 
C2 0.034(4) 0.059(4) 0.045(4) 0.017(3) 0.002(3) 0.015(3) 
N3 0.029(3) 0.041(3) 0.032(3) -0.001(2) 0.001(2) -0.004(2) 
N4 0.028(3) 0.046(3) 0.040(3) 0.011(2) 0.007(2) 0.002(2) 
C3 0.045(4) 0.049(4) 0.045(4) -0.012(3) 0.007(3) -0.006(3) 
C4 0.041(4) 0.043(3) 0.043(4) 0.001(3) 0.013(3) 0.006(3) 
N5 0.034(3) 0.045(3) 0.029(3) 0.005(2) 0.003(2) 0.000(2) 
N6 0.032(3) 0.031(3) 0.043(3) 0.001(2) -0.010(2) 0.000(2) 
C5 0.074(5) 0.051(4) 0.035(4) 0.007(3) 0.002(3) -0.002(4) 
C6 0.058(5) 0.058(4) 0.031(3) 0.006(3) -0.001(3) -0.003(3) 
N7A 0.061(4) 0.049(3) 0.034(3) -0.001(2) 0.008(3) -0.020(3) 
N8A 0.033(3) 0.040(3) 0.043(3) -0.002(2) -0.008(2) 0.000(2) 
C7A 0.050(9) 0.056(9) 0.053(8) -0.001(7) 0.019(7) -0.022(7) 
C8A 0.022(7) 0.055(9) 0.041(8) -0.002(6) 0.008(5) -0.006(5) 
N7B 0.061(4) 0.049(3) 0.034(3) -0.001(2) 0.008(3) -0.020(3) 
N8B 0.033(3) 0.040(3) 0.043(3) -0.002(2) -0.008(2) 0.000(2) 
C7B 0.046(12) 0.031(10) 0.059(12) 0.012(8) 0.017(9) -0.009(8) 
C8B 0.022(11) 0.067(17) 0.08(2) -0.010(14) 0.022(12) -0.012(10) 
O1 0.058(13) 0.062(13) 0.056(13) 0.004(10) 0.003(10) -0.002(10) 
 
_geom_special_details 
; 
 All esds (except the esd in the dihedral angle between two l.s. planes) 
 are estimated using the full covariance matrix.  The cell esds are taken 
 into account individually in the estimation of esds in distances, angles 
 and torsion angles; correlations between esds in cell parameters are only 
 used when they are defined by crystal symmetry.  An approximate (isotropic) 
 treatment of cell esds is used for estimating esds involving l.s. planes. 
; 
 
loop_ 
 _geom_bond_atom_site_label_1 
 _geom_bond_atom_site_label_2 
 _geom_bond_distance 
 _geom_bond_site_symmetry_2 
 _geom_bond_publ_flag 
La1 N2 2.683(5) . ? 
La1 N6 2.697(5) . ? 
La1 N4 2.706(5) . ? 
La1 N3 2.708(5) . ? 
La1 N8A 2.717(5) . ? 
La1 N7A 2.725(5) . ? 
La1 N5 2.730(5) . ? 
La1 N1 2.797(5) . ? 
La1 S3 3.0424(16) . ? 
Sb1 S5 2.3396(17) . ? 
Sb1 S2 2.4793(17) 3_666 ? 
Sb1 S4 2.5178(15) . ? 
Sn1 S1 2.3224(17) . ? 
Sn1 S3 2.3654(15) . ? 
Sn1 S2 2.4270(16) . ? 
Sn1 S4 2.4447(16) . ? 
S2 Sb1 2.4793(17) 3_666 ? 
N1 C1 1.476(8) . ? 
N1 H1A 0.9000 . ? 
N1 H1B 0.9000 . ? 
N2 C2 1.472(8) . ? 
N2 H2A 0.9000 . ? 
N2 H2B 0.9000 . ? 
C1 C2 1.499(9) . ? 
C1 H1C 0.9700 . ? 
C1 H1D 0.9700 . ? 
C2 H2C 0.9700 . ? 
C2 H2D 0.9700 . ? 
N3 C3 1.476(8) . ? 
N3 H3A 0.9000 . ? 
N3 H3B 0.9000 . ? 
N4 C4 1.485(8) . ? 
N4 H4A 0.9000 . ? 
N4 H4B 0.9000 . ? 
C3 C4 1.509(9) . ? 
C3 H3C 0.9700 . ? 
C3 H3D 0.9700 . ? 
C4 H4C 0.9700 . ? 
C4 H4D 0.9700 . ? 
N5 C5 1.460(8) . ? 
N5 H5A 0.9000 . ? 
N5 H5B 0.9000 . ? 
N6 C6 1.499(8) . ? 
N6 H6A 0.9000 . ? 
N6 H6B 0.9000 . ? 
C5 C6 1.471(9) . ? 
C5 H5C 0.9700 . ? 
C5 H5D 0.9700 . ? 
C6 H6C 0.9700 . ? 
C6 H6D 0.9700 . ? 
N7A C7A 1.564(15) . ? 
N7A H7A 0.9000 . ? 
N7A H7B 0.9000 . ? 
N8A C8A 1.423(15) . ? 
N8A H8A 0.9000 . ? 
N8A H8B 0.9000 . ? 
C7A C8A 1.497(19) . ? 
C7A H7C 0.9700 . ? 
C7A H7D 0.9700 . ? 
C8A H8C 0.9700 . ? 
C8A H8D 0.9700 . ? 
C7B C8B 1.50(3) . ? 
C7B H7G 0.9700 . ? 
C7B H7H 0.9700 . ? 
C8B H8G 0.9700 . ? 
C8B H8H 0.9700 . ? 
O1 H1E 0.8599 . ? 
O1 H1F 0.8602 . ? 
 
loop_ 
 _geom_angle_atom_site_label_1 
 _geom_angle_atom_site_label_2 
 _geom_angle_atom_site_label_3 
 _geom_angle 
 _geom_angle_site_symmetry_1 
 _geom_angle_site_symmetry_3 
 _geom_angle_publ_flag 
N2 La1 N6 122.77(15) . . ? 
N2 La1 N4 139.29(16) . . ? 
N6 La1 N4 70.13(15) . . ? 
N2 La1 N3 78.55(15) . . ? 
N6 La1 N3 123.73(15) . . ? 
N4 La1 N3 64.77(15) . . ? 
N2 La1 N8A 140.39(15) . . ? 
N6 La1 N8A 72.88(15) . . ? 
N4 La1 N8A 78.77(16) . . ? 
N3 La1 N8A 125.86(15) . . ? 
N2 La1 N7A 107.61(17) . . ? 
N6 La1 N7A 129.03(17) . . ? 
N4 La1 N7A 77.19(16) . . ? 
N3 La1 N7A 70.58(15) . . ? 
N8A La1 N7A 63.02(16) . . ? 
N2 La1 N5 78.11(16) . . ? 
N6 La1 N5 62.69(15) . . ? 
N4 La1 N5 132.00(15) . . ? 
N3 La1 N5 154.24(15) . . ? 
N8A La1 N5 79.63(16) . . ? 
N7A La1 N5 127.45(15) . . ? 
N2 La1 N1 62.43(16) . . ? 
N6 La1 N1 125.87(16) . . ? 
N4 La1 N1 146.04(15) . . ? 
N3 La1 N1 110.29(15) . . ? 
N8A La1 N1 78.88(16) . . ? 
N7A La1 N1 69.97(16) . . ? 
N5 La1 N1 67.48(15) . . ? 
N2 La1 S3 72.81(11) . . ? 
N6 La1 S3 66.02(11) . . ? 
N4 La1 S3 80.92(11) . . ? 
N3 La1 S3 75.09(10) . . ? 
N8A La1 S3 138.28(11) . . ? 
N7A La1 S3 144.66(12) . . ? 
N5 La1 S3 87.71(11) . . ? 
N1 La1 S3 131.93(12) . . ? 
S5 Sb1 S2 99.73(6) . 3_666 ? 
S5 Sb1 S4 93.75(5) . . ? 
S2 Sb1 S4 94.92(6) 3_666 . ? 
S1 Sn1 S3 117.95(6) . . ? 
S1 Sn1 S2 111.24(6) . . ? 
S3 Sn1 S2 103.63(6) . . ? 
S1 Sn1 S4 108.18(6) . . ? 
S3 Sn1 S4 108.77(5) . . ? 
S2 Sn1 S4 106.47(5) . . ? 
Sn1 S2 Sb1 97.27(6) . 3_666 ? 
Sn1 S3 La1 125.29(6) . . ? 
Sn1 S4 Sb1 102.22(5) . . ? 
C1 N1 La1 111.9(4) . . ? 
C1 N1 H1A 109.2 . . ? 
La1 N1 H1A 109.2 . . ? 
C1 N1 H1B 109.2 . . ? 
La1 N1 H1B 109.2 . . ? 
H1A N1 H1B 107.9 . . ? 
C2 N2 La1 118.2(4) . . ? 
C2 N2 H2A 107.8 . . ? 
La1 N2 H2A 107.8 . . ? 
C2 N2 H2B 107.8 . . ? 
La1 N2 H2B 107.8 . . ? 
H2A N2 H2B 107.1 . . ? 
N1 C1 C2 108.9(5) . . ? 
N1 C1 H1C 109.9 . . ? 
C2 C1 H1C 109.9 . . ? 
N1 C1 H1D 109.9 . . ? 
C2 C1 H1D 109.9 . . ? 
H1C C1 H1D 108.3 . . ? 
N2 C2 C1 109.4(5) . . ? 
N2 C2 H2C 109.8 . . ? 
C1 C2 H2C 109.8 . . ? 
N2 C2 H2D 109.8 . . ? 
C1 C2 H2D 109.8 . . ? 
H2C C2 H2D 108.2 . . ? 
C3 N3 La1 112.9(4) . . ? 
C3 N3 H3A 109.0 . . ? 
La1 N3 H3A 109.0 . . ? 
C3 N3 H3B 109.0 . . ? 
La1 N3 H3B 109.0 . . ? 
H3A N3 H3B 107.8 . . ? 
C4 N4 La1 114.8(4) . . ? 
C4 N4 H4A 108.6 . . ? 
La1 N4 H4A 108.6 . . ? 
C4 N4 H4B 108.6 . . ? 
La1 N4 H4B 108.6 . . ? 
H4A N4 H4B 107.5 . . ? 
N3 C3 C4 112.0(5) . . ? 
N3 C3 H3C 109.2 . . ? 
C4 C3 H3C 109.2 . . ? 
N3 C3 H3D 109.2 . . ? 
C4 C3 H3D 109.2 . . ? 
H3C C3 H3D 107.9 . . ? 
N4 C4 C3 109.9(5) . . ? 
N4 C4 H4C 109.7 . . ? 
C3 C4 H4C 109.7 . . ? 
N4 C4 H4D 109.7 . . ? 
C3 C4 H4D 109.7 . . ? 
H4C C4 H4D 108.2 . . ? 
C5 N5 La1 116.9(4) . . ? 
C5 N5 H5A 108.1 . . ? 
La1 N5 H5A 108.1 . . ? 
C5 N5 H5B 108.1 . . ? 
La1 N5 H5B 108.1 . . ? 
H5A N5 H5B 107.3 . . ? 
C6 N6 La1 113.3(4) . . ? 
C6 N6 H6A 108.9 . . ? 
La1 N6 H6A 108.9 . . ? 
C6 N6 H6B 108.9 . . ? 
La1 N6 H6B 108.9 . . ? 
H6A N6 H6B 107.7 . . ? 
N5 C5 C6 110.9(6) . . ? 
N5 C5 H5C 109.5 . . ? 
C6 C5 H5C 109.5 . . ? 
N5 C5 H5D 109.5 . . ? 
C6 C5 H5D 109.5 . . ? 
H5C C5 H5D 108.1 . . ? 
C5 C6 N6 109.3(5) . . ? 
C5 C6 H6C 109.8 . . ? 
N6 C6 H6C 109.8 . . ? 
C5 C6 H6D 109.8 . . ? 
N6 C6 H6D 109.8 . . ? 
H6C C6 H6D 108.3 . . ? 
C7A N7A La1 113.0(5) . . ? 
C7A N7A H7A 109.0 . . ? 
La1 N7A H7A 109.0 . . ? 
C7A N7A H7B 109.0 . . ? 
La1 N7A H7B 109.0 . . ? 
H7A N7A H7B 107.8 . . ? 
C8A N8A La1 117.6(7) . . ? 
C8A N8A H8A 107.9 . . ? 
La1 N8A H8A 107.9 . . ? 
C8A N8A H8B 107.9 . . ? 
La1 N8A H8B 107.9 . . ? 
H8A N8A H8B 107.2 . . ? 
C8A C7A N7A 108.3(11) . . ? 
C8A C7A H7C 110.0 . . ? 
N7A C7A H7C 110.0 . . ? 
C8A C7A H7D 110.0 . . ? 
N7A C7A H7D 110.0 . . ? 
H7C C7A H7D 108.4 . . ? 
N8A C8A C7A 109.4(12) . . ? 
N8A C8A H8C 109.8 . . ? 
C7A C8A H8C 109.8 . . ? 
N8A C8A H8D 109.8 . . ? 
C7A C8A H8D 109.8 . . ? 
H8C C8A H8D 108.2 . . ? 
C8B C7B H7G 111.5 . . ? 
C8B C7B H7H 111.5 . . ? 
H7G C7B H7H 109.3 . . ? 
C7B C8B H8G 110.2 . . ? 
C7B C8B H8H 110.2 . . ? 
H8G C8B H8H 108.5 . . ? 
H1E O1 H1F 100.2 . . ? 
 
loop_ 
 _geom_hbond_atom_site_label_D 
 _geom_hbond_atom_site_label_H 
 _geom_hbond_atom_site_label_A 
 _geom_hbond_distance_DH 
 _geom_hbond_distance_HA 
 _geom_hbond_distance_DA 
 _geom_hbond_angle_DHA 
 _geom_hbond_site_symmetry_A 
N2 H2A S5  0.90 2.62 3.468(5) 157.3 3_666 
N5 H5A S5  0.90 2.52 3.416(5) 176.8 3_666 
N3 H3B S1  0.90 2.74 3.580(5) 156.6 . 
N1 H1B S1  0.90 2.82 3.682(6) 159.9 4_565 
N3 H3A S5  0.90 2.69 3.476(5) 146.9 2_546 
N4 H4A S3  0.90 2.73 3.590(5) 160.4 3_566 
N4 H4B S2  0.90 2.72 3.521(5) 148.3 1_455 
N5 H5B S1  0.90 2.64 3.432(5) 147.8 4_565 
N6 H6A S4  0.90 2.64 3.477(5) 154.8 3_566 
N6 H6B S3  0.90 2.62 3.444(5) 152.7 3_566 
N7A H7B S5  0.90 2.68 3.559(5) 165.4 2_546 
N8A H8A S4  0.90 2.82 3.656(5) 155.8 3_566 
N8A H8B S1  0.90 2.58 3.375(6) 148.2 4_565 
N7B H7E S4  0.90 2.82 3.708(6) 170.8 2_546 
N8B H8E S4  0.90 2.76 3.656(5) 173.2 3_566 
N8B H8F S1  0.90 2.48 3.375(6) 172.3 4_565 
N1 H1A O1  0.90 2.64 3.42(2) 145.2 2_546 
N7A H7A O1  0.90 2.29 3.08(2) 146.7 2_546 
O1 H1E S1  0.86 2.67 3.26(2) 127.6 . 
O1 H1F S4  0.86 2.93 3.79(2) 179.6 . 
 
_diffrn_measured_fraction_theta_max    0.997 
_diffrn_reflns_theta_full              27.49 
_diffrn_measured_fraction_theta_full   0.997 
_refine_diff_density_max    1.540 
_refine_diff_density_min   -1.686 
_refine_diff_density_rms    0.185 

#===END

data_compound-1'
 
_audit_creation_method            SHELXL-97 
_chemical_name_systematic 
; 
 ? 
; 
_chemical_name_common             ? 
_chemical_melting_point           ? 
_chemical_formula_moiety          'C16 H64 La2 N16 S10 Sb2 Sn2' 
_chemical_formula_sum 
 'C16 H64 La2 N16 S10 Sb2 Sn2' 
_chemical_formula_weight          1560.13 
 
loop_ 
 _atom_type_symbol 
 _atom_type_description 
 _atom_type_scat_dispersion_real 
 _atom_type_scat_dispersion_imag 
 _atom_type_scat_source 
 'C'  'C'   0.0033   0.0016 
 'International Tables Vol C Tables 4.2.6.8 and 6.1.1.4' 
 'H'  'H'   0.0000   0.0000 
 'International Tables Vol C Tables 4.2.6.8 and 6.1.1.4' 
 'N'  'N'   0.0061   0.0033 
 'International Tables Vol C Tables 4.2.6.8 and 6.1.1.4' 
 'S'  'S'   0.1246   0.1234 
 'International Tables Vol C Tables 4.2.6.8 and 6.1.1.4' 
 'Sn'  'Sn'  -0.6537   1.4246 
 'International Tables Vol C Tables 4.2.6.8 and 6.1.1.4' 
 'Sb'  'Sb'  -0.5866   1.5461 
 'International Tables Vol C Tables 4.2.6.8 and 6.1.1.4' 
 'La'  'La'  -0.2871   2.4523 
 'International Tables Vol C Tables 4.2.6.8 and 6.1.1.4' 
 
_symmetry_cell_setting            monoclinic 
_symmetry_space_group_name_H-M    'P 21/n'
_symmetry_space_group_name_Hall   '-P 2yn'

 
loop_ 
 _symmetry_equiv_pos_as_xyz 
 'x, y, z' 
 '-x+1/2, y+1/2, -z+1/2' 
 '-x, -y, -z' 
 'x-1/2, -y-1/2, z-1/2' 
 
_cell_length_a                    10.7818(9) 
_cell_length_b                    16.3090(17) 
_cell_length_c                    14.2616(13) 
_cell_angle_alpha                 90.00 
_cell_angle_beta                  98.996(4) 
_cell_angle_gamma                 90.00 
_cell_volume                      2476.9(4) 
_cell_formula_units_Z             2 
_cell_measurement_temperature     293(2) 
_cell_measurement_reflns_used     6370 
_cell_measurement_theta_min       3.1463
_cell_measurement_theta_max       7.4719 
 
_exptl_crystal_description        Prismatic 
_exptl_crystal_colour             Orange 
_exptl_crystal_size_max           0.30 
_exptl_crystal_size_mid           0.20 
_exptl_crystal_size_min           0.20 
_exptl_crystal_density_meas       ? 
_exptl_crystal_density_diffrn     2.092 
_exptl_crystal_density_method     'not measured' 
_exptl_crystal_F_000              1496 
_exptl_absorpt_coefficient_mu     4.208 
_exptl_absorpt_correction_type    'Multi-scan' 
_exptl_absorpt_correction_T_min   0.275 
_exptl_absorpt_correction_T_max   0.430 
_exptl_absorpt_process_details     'CrystalClear (Rigaku/MSC Inc., 2005)' 
 
_exptl_special_details 
; 
 ? 
; 
 
_diffrn_ambient_temperature       293(2) 
_diffrn_radiation_wavelength      0.71073 
_diffrn_radiation_type            MoK\a 
_diffrn_radiation_source          'fine-focus sealed tube' 
_diffrn_radiation_monochromator   graphite 
_diffrn_measurement_device_type   'Mercury70 (2x2 bin mode)' 
_diffrn_measurement_method        'CCD_Profile_fitting'  
_diffrn_detector_area_resol_mean  14.6306 
_diffrn_standards_number          ? 
_diffrn_standards_interval_count  ? 
_diffrn_standards_interval_time   ? 
_diffrn_standards_decay_%         ? 
_diffrn_reflns_number             18897 
_diffrn_reflns_av_R_equivalents   0.0518 
_diffrn_reflns_av_sigmaI/netI     0.0533 
_diffrn_reflns_limit_h_min        -14 
_diffrn_reflns_limit_h_max        14 
_diffrn_reflns_limit_k_min        -21 
_diffrn_reflns_limit_k_max        21 
_diffrn_reflns_limit_l_min        -18 
_diffrn_reflns_limit_l_max        16 
_diffrn_reflns_theta_min          2.50 
_diffrn_reflns_theta_max          27.48 
_reflns_number_total              5662 
_reflns_number_gt                 4912 
_reflns_threshold_expression      >2sigma(I) 
 
_computing_data_collection         'CrystalClear (Rigaku/MSC Inc., 2005)' 
_computing_cell_refinement         'CrystalClear (Rigaku/MSC Inc., 2005)' 
_computing_data_reduction          'CrystalClear (Rigaku/MSC Inc., 2005)' 
_computing_structure_solution     'SHELXS-97 (Sheldrick, 1990)' 
_computing_structure_refinement   'SHELXL-97 (Sheldrick, 1997)' 
_computing_molecular_graphics     'Diamond 3.0' 
_computing_publication_material   'Windows Word 2003'  
 
_refine_special_details 
; 
 Refinement of F^2^ against ALL reflections.  The weighted R-factor wR and 
 goodness of fit S are based on F^2^, conventional R-factors R are based 
 on F, with F set to zero for negative F^2^. The threshold expression of 
 F^2^ > 2sigma(F^2^) is used only for calculating R-factors(gt) etc. and is 
 not relevant to the choice of reflections for refinement.  R-factors based 
 on F^2^ are statistically about twice as large as those based on F, and R- 
 factors based on ALL data will be even larger. 
; 
 
_refine_ls_structure_factor_coef  Fsqd  
_refine_ls_matrix_type            full 
_refine_ls_weighting_scheme       calc  
_refine_ls_weighting_details 
 'calc w=1/[\s^2^(Fo^2^)+(0.0268P)^2^+4.0910P] where P=(Fo^2^+2Fc^2^)/3' 
_atom_sites_solution_primary      direct 
_atom_sites_solution_secondary    difmap 
_atom_sites_solution_hydrogens    geom 
_refine_ls_hydrogen_treatment     constr 
_refine_ls_extinction_method      none 
_refine_ls_extinction_coef        ? 
_refine_ls_number_reflns          5662 
_refine_ls_number_parameters      224 
_refine_ls_number_restraints      0 
_refine_ls_R_factor_all           0.0524 
_refine_ls_R_factor_gt            0.0427 
_refine_ls_wR_factor_ref          0.0859 
_refine_ls_wR_factor_gt           0.0813 
_refine_ls_goodness_of_fit_ref    1.104 
_refine_ls_restrained_S_all       1.104 
_refine_ls_shift/su_max           0.001 
_refine_ls_shift/su_mean          0.000 
 
loop_ 
 _atom_site_label 
 _atom_site_type_symbol 
 _atom_site_fract_x 
 _atom_site_fract_y 
 _atom_site_fract_z 
 _atom_site_U_iso_or_equiv 
 _atom_site_adp_type 
 _atom_site_occupancy 
 _atom_site_symetry_multiplicity 
 _atom_site_calc_flag 
 _atom_site_refinement_flags 
 _atom_site_disorder_assembly 
 _atom_site_disorder_group 
La1 La 0.00627(3) 0.278129(19) 0.55320(2) 0.02278(9) Uani 1 1 d . B . 
Sb1 Sb 0.59152(3) 0.61128(2) 0.57809(3) 0.02626(10) Uani 1 1 d . . . 
Sn1 Sn 0.35405(3) 0.45870(2) 0.65717(2) 0.02225(10) Uani 1 1 d . . . 
S1 S 0.35857(16) 0.42078(11) 0.81457(10) 0.0383(4) Uani 1 1 d . . . 
S2 S 0.51933(13) 0.39203(10) 0.58775(10) 0.0331(3) Uani 1 1 d . . . 
S3 S 0.17083(12) 0.42863(9) 0.54775(10) 0.0274(3) Uani 1 1 d . . . 
S4 S 0.39409(13) 0.60583(9) 0.65214(10) 0.0288(3) Uani 1 1 d . . . 
S5 S 0.61475(15) 0.75307(10) 0.59852(11) 0.0368(4) Uani 1 1 d . . . 
N1 N 0.0576(5) 0.1102(3) 0.5412(4) 0.0398(13) Uani 1 1 d . . . 
H1A H 0.0380 0.0847 0.5929 0.048 Uiso 1 1 calc R . . 
H1B H 0.0090 0.0891 0.4899 0.048 Uiso 1 1 calc R . . 
N2 N 0.2451(4) 0.2296(3) 0.6017(4) 0.0338(12) Uani 1 1 d . . . 
H2A H 0.2890 0.2494 0.5580 0.041 Uiso 1 1 calc R . . 
H2B H 0.2757 0.2537 0.6573 0.041 Uiso 1 1 calc R . . 
C1 C 0.1899(6) 0.0946(4) 0.5344(5) 0.0410(16) Uani 1 1 d . . . 
H1C H 0.2076 0.1120 0.4728 0.049 Uiso 1 1 calc R . . 
H1D H 0.2074 0.0363 0.5412 0.049 Uiso 1 1 calc R . . 
C2 C 0.2717(6) 0.1413(4) 0.6118(4) 0.0402(15) Uani 1 1 d . . . 
H2C H 0.2557 0.1225 0.6733 0.048 Uiso 1 1 calc R . . 
H2D H 0.3595 0.1312 0.6079 0.048 Uiso 1 1 calc R . . 
N3 N 0.0578(4) 0.3308(3) 0.7357(3) 0.0331(11) Uani 1 1 d . . . 
H3A H 0.0345 0.2919 0.7741 0.040 Uiso 1 1 calc R . . 
H3B H 0.1412 0.3380 0.7513 0.040 Uiso 1 1 calc R . . 
N4 N -0.1521(5) 0.3929(3) 0.6026(3) 0.0345(12) Uani 1 1 d . . . 
H4A H -0.1375 0.4404 0.5741 0.041 Uiso 1 1 calc R . . 
H4B H -0.2313 0.3775 0.5800 0.041 Uiso 1 1 calc R . . 
C3 C -0.0069(6) 0.4085(4) 0.7516(5) 0.0409(15) Uani 1 1 d . . . 
H3C H 0.0358 0.4537 0.7260 0.049 Uiso 1 1 calc R . . 
H3D H -0.0024 0.4174 0.8193 0.049 Uiso 1 1 calc R . . 
C4 C -0.1424(6) 0.4078(4) 0.7057(4) 0.0392(15) Uani 1 1 d . . . 
H4C H -0.1870 0.3651 0.7342 0.047 Uiso 1 1 calc R . . 
H4D H -0.1809 0.4600 0.7164 0.047 Uiso 1 1 calc R . . 
N5 N 0.0671(5) 0.2342(3) 0.3817(3) 0.0341(11) Uani 1 1 d . . . 
H5A H 0.1513 0.2351 0.3863 0.041 Uiso 1 1 calc R . . 
H5B H 0.0421 0.1820 0.3697 0.041 Uiso 1 1 calc R . . 
N6 N -0.0700(4) 0.3783(3) 0.4051(4) 0.0359(12) Uani 1 1 d . . . 
H6A H -0.1502 0.3665 0.3811 0.043 Uiso 1 1 calc R . . 
H6B H -0.0674 0.4305 0.4259 0.043 Uiso 1 1 calc R . . 
C5 C 0.0137(8) 0.2849(4) 0.2998(4) 0.0519(19) Uani 1 1 d . . . 
H5C H 0.0648 0.2796 0.2499 0.062 Uiso 1 1 calc R . . 
H5D H -0.0703 0.2660 0.2752 0.062 Uiso 1 1 calc R . . 
C6 C 0.0091(7) 0.3709(4) 0.3279(4) 0.0454(17) Uani 1 1 d . . . 
H6C H -0.0267 0.4039 0.2737 0.054 Uiso 1 1 calc R . . 
H6D H 0.0933 0.3907 0.3504 0.054 Uiso 1 1 calc R . . 
N7 N -0.1312(5) 0.1903(4) 0.6627(3) 0.0450(14) Uani 1 1 d . . . 
H7A H -0.0797 0.1493 0.6864 0.054 Uiso 1 1 d R B . 
H7B H -0.1522 0.2204 0.7108 0.054 Uiso 1 1 d R . . 
N8 N -0.2209(5) 0.2213(3) 0.4671(4) 0.0376(12) Uani 1 1 d . . . 
H8A H -0.2755 0.2634 0.4601 0.045 Uiso 1 1 calc R A 1 
H8B H -0.2128 0.2035 0.4086 0.045 Uiso 1 1 calc R A 1 
C7A C -0.2736(13) 0.1842(9) 0.6137(11) 0.040(2) Uani 0.473(10) 1 d P B 1 
H7C H -0.3189 0.1459 0.6479 0.048 Uiso 0.473(10) 1 calc PR B 1 
H7D H -0.3139 0.2374 0.6135 0.048 Uiso 0.473(10) 1 calc PR B 1 
C8A C -0.2737(16) 0.1558(12) 0.5166(17) 0.041(3) Uani 0.473(10) 1 d P B 1 
H8C H -0.2234 0.1065 0.5164 0.050 Uiso 0.473(10) 1 calc PR B 1 
H8D H -0.3586 0.1437 0.4862 0.050 Uiso 0.473(10) 1 calc PR B 1 
C7B C -0.2233(11) 0.1344(8) 0.6134(9) 0.040(2) Uani 0.527(10) 1 d P B 2 
H7G H -0.2758 0.1123 0.6567 0.048 Uiso 0.527(10) 1 calc PR B 2 
H7H H -0.1820 0.0892 0.5866 0.048 Uiso 0.527(10) 1 calc PR B 2 
C8B C -0.3038(15) 0.1843(11) 0.5333(15) 0.041(3) Uani 0.527(10) 1 d P B 2 
H8G H -0.3661 0.1488 0.4975 0.050 Uiso 0.527(10) 1 calc PR B 2 
H8H H -0.3476 0.2278 0.5611 0.050 Uiso 0.527(10) 1 calc PR B 2 
 
loop_ 
 _atom_site_aniso_label 
 _atom_site_aniso_U_11 
 _atom_site_aniso_U_22 
 _atom_site_aniso_U_33 
 _atom_site_aniso_U_23 
 _atom_site_aniso_U_13 
 _atom_site_aniso_U_12 
La1 0.02052(16) 0.02362(19) 0.02400(16) 0.00116(12) 0.00285(12) -0.00044(12) 
Sb1 0.02169(19) 0.0301(2) 0.0279(2) -0.00234(15) 0.00669(15) -0.00240(15) 
Sn1 0.02051(18) 0.0242(2) 0.02233(19) -0.00151(14) 0.00443(14) -0.00082(14) 
S1 0.0447(9) 0.0453(10) 0.0251(7) 0.0076(7) 0.0057(6) 0.0028(7) 
S2 0.0234(7) 0.0424(10) 0.0330(7) -0.0101(6) 0.0032(6) 0.0067(6) 
S3 0.0227(7) 0.0277(8) 0.0304(7) 0.0015(6) -0.0001(5) -0.0053(6) 
S4 0.0250(7) 0.0247(8) 0.0395(8) -0.0049(6) 0.0134(6) -0.0041(6) 
S5 0.0402(9) 0.0338(9) 0.0400(8) -0.0098(7) 0.0176(7) -0.0115(7) 
N1 0.043(3) 0.037(3) 0.041(3) 0.004(2) 0.010(2) -0.001(2) 
N2 0.030(3) 0.034(3) 0.037(3) 0.003(2) 0.003(2) 0.004(2) 
C1 0.046(4) 0.028(4) 0.051(4) 0.009(3) 0.015(3) 0.009(3) 
C2 0.033(3) 0.043(4) 0.044(4) 0.013(3) 0.004(3) 0.012(3) 
N3 0.031(3) 0.036(3) 0.032(3) 0.004(2) 0.004(2) -0.004(2) 
N4 0.030(3) 0.033(3) 0.042(3) 0.007(2) 0.008(2) 0.003(2) 
C3 0.044(4) 0.037(4) 0.042(4) -0.008(3) 0.009(3) -0.004(3) 
C4 0.041(4) 0.034(4) 0.047(4) 0.003(3) 0.021(3) 0.008(3) 
N5 0.035(3) 0.034(3) 0.033(3) 0.005(2) 0.007(2) 0.001(2) 
N6 0.027(3) 0.031(3) 0.046(3) 0.002(2) -0.005(2) 0.000(2) 
C5 0.076(5) 0.054(5) 0.025(3) 0.005(3) 0.008(3) 0.006(4) 
C6 0.060(4) 0.043(4) 0.030(3) 0.009(3) -0.001(3) -0.002(3) 
N7 0.053(3) 0.055(4) 0.028(3) -0.001(2) 0.012(2) -0.017(3) 
N8 0.035(3) 0.039(3) 0.036(3) 0.000(2) -0.002(2) -0.003(2) 
C7A 0.031(5) 0.037(7) 0.055(5) 0.002(5) 0.013(4) -0.006(4) 
C8A 0.018(7) 0.032(10) 0.074(9) 0.005(8) 0.003(6) 0.005(5) 
C7B 0.031(5) 0.037(7) 0.055(5) 0.002(5) 0.013(4) -0.006(4) 
C8B 0.018(7) 0.032(10) 0.074(9) 0.005(8) 0.003(6) 0.005(5) 
 
_geom_special_details 
; 
 All esds (except the esd in the dihedral angle between two l.s. planes) 
 are estimated using the full covariance matrix.  The cell esds are taken 
 into account individually in the estimation of esds in distances, angles 
 and torsion angles; correlations between esds in cell parameters are only 
 used when they are defined by crystal symmetry.  An approximate (isotropic) 
 treatment of cell esds is used for estimating esds involving l.s. planes. 
; 
 
loop_ 
 _geom_bond_atom_site_label_1 
 _geom_bond_atom_site_label_2 
 _geom_bond_distance 
 _geom_bond_site_symmetry_2 
 _geom_bond_publ_flag 
La1 N2 2.679(5) . ? 
La1 N6 2.694(5) . ? 
La1 N4 2.700(5) . ? 
La1 N3 2.714(5) . ? 
La1 N7 2.723(5) . ? 
La1 N8 2.725(5) . ? 
La1 N5 2.725(5) . ? 
La1 N1 2.805(5) . ? 
La1 S3 3.0367(14) . ? 
Sb1 S5 2.3393(16) . ? 
Sb1 S2 2.4781(15) 3_666 ? 
Sb1 S4 2.5214(14) . ? 
Sn1 S1 2.3216(15) . ? 
Sn1 S3 2.3693(14) . ? 
Sn1 S2 2.4269(14) . ? 
Sn1 S4 2.4410(15) . ? 
S2 Sb1 2.4781(15) 3_666 ? 
N1 C1 1.467(8) . ? 
N1 H1A 0.9000 . ? 
N1 H1B 0.9000 . ? 
N2 C2 1.471(8) . ? 
N2 H2A 0.9000 . ? 
N2 H2B 0.9000 . ? 
C1 C2 1.507(9) . ? 
C1 H1C 0.9700 . ? 
C1 H1D 0.9700 . ? 
C2 H2C 0.9700 . ? 
C2 H2D 0.9700 . ? 
N3 C3 1.482(8) . ? 
N3 H3A 0.9000 . ? 
N3 H3B 0.9000 . ? 
N4 C4 1.479(8) . ? 
N4 H4A 0.9000 . ? 
N4 H4B 0.9000 . ? 
C3 C4 1.504(9) . ? 
C3 H3C 0.9700 . ? 
C3 H3D 0.9700 . ? 
C4 H4C 0.9700 . ? 
C4 H4D 0.9700 . ? 
N5 C5 1.473(7) . ? 
N5 H5A 0.9000 . ? 
N5 H5B 0.9000 . ? 
N6 C6 1.500(8) . ? 
N6 H6A 0.9000 . ? 
N6 H6B 0.9000 . ? 
C5 C6 1.461(9) . ? 
C5 H5C 0.9700 . ? 
C5 H5D 0.9700 . ? 
C6 H6C 0.9700 . ? 
C6 H6D 0.9700 . ? 
N7 C7B 1.447(13) . ? 
N7 C7A 1.588(15) . ? 
N7 H7A 0.9000 . ? 
N7 H7B 0.8999 . ? 
N8 C8A 1.44(2) . ? 
N8 C8B 1.522(19) . ? 
N8 H8A 0.9000 . ? 
N8 H8B 0.9000 . ? 
C7A C8A 1.46(3) . ? 
C7A H7C 0.9700 . ? 
C7A H7D 0.9700 . ? 
C8A H8C 0.9700 . ? 
C8A H8D 0.9700 . ? 
C7B C8B 1.55(2) . ? 
C7B H7G 0.9700 . ? 
C7B H7H 0.9700 . ? 
C8B H8G 0.9700 . ? 
C8B H8H 0.9700 . ? 
 
loop_ 
 _geom_angle_atom_site_label_1 
 _geom_angle_atom_site_label_2 
 _geom_angle_atom_site_label_3 
 _geom_angle 
 _geom_angle_site_symmetry_1 
 _geom_angle_site_symmetry_3 
 _geom_angle_publ_flag 
N2 La1 N6 123.00(15) . . ? 
N2 La1 N4 139.37(15) . . ? 
N6 La1 N4 69.90(15) . . ? 
N2 La1 N3 78.55(15) . . ? 
N6 La1 N3 123.45(15) . . ? 
N4 La1 N3 64.76(15) . . ? 
N2 La1 N7 106.49(16) . . ? 
N6 La1 N7 129.93(16) . . ? 
N4 La1 N7 77.98(17) . . ? 
N3 La1 N7 70.40(15) . . ? 
N2 La1 N8 140.85(15) . . ? 
N6 La1 N8 73.18(15) . . ? 
N4 La1 N8 78.05(16) . . ? 
N3 La1 N8 125.08(15) . . ? 
N7 La1 N8 63.13(15) . . ? 
N2 La1 N5 78.32(15) . . ? 
N6 La1 N5 62.80(15) . . ? 
N4 La1 N5 131.85(14) . . ? 
N3 La1 N5 154.39(15) . . ? 
N7 La1 N5 127.26(15) . . ? 
N8 La1 N5 80.30(15) . . ? 
N2 La1 N1 62.37(15) . . ? 
N6 La1 N1 125.67(15) . . ? 
N4 La1 N1 146.27(15) . . ? 
N3 La1 N1 110.78(15) . . ? 
N7 La1 N1 69.62(17) . . ? 
N8 La1 N1 79.18(16) . . ? 
N5 La1 N1 67.10(15) . . ? 
N2 La1 S3 72.76(11) . . ? 
N6 La1 S3 66.29(11) . . ? 
N4 La1 S3 80.93(11) . . ? 
N3 La1 S3 74.69(10) . . ? 
N7 La1 S3 144.35(11) . . ? 
N8 La1 S3 138.68(11) . . ? 
N5 La1 S3 88.06(11) . . ? 
N1 La1 S3 131.76(11) . . ? 
S5 Sb1 S2 99.60(6) . 3_666 ? 
S5 Sb1 S4 93.65(5) . . ? 
S2 Sb1 S4 94.95(5) 3_666 . ? 
S1 Sn1 S3 118.10(6) . . ? 
S1 Sn1 S2 111.68(6) . . ? 
S3 Sn1 S2 103.20(5) . . ? 
S1 Sn1 S4 108.25(6) . . ? 
S3 Sn1 S4 108.50(5) . . ? 
S2 Sn1 S4 106.49(5) . . ? 
Sn1 S2 Sb1 97.11(5) . 3_666 ? 
Sn1 S3 La1 125.50(5) . . ? 
Sn1 S4 Sb1 102.23(5) . . ? 
C1 N1 La1 112.2(4) . . ? 
C1 N1 H1A 109.2 . . ? 
La1 N1 H1A 109.2 . . ? 
C1 N1 H1B 109.2 . . ? 
La1 N1 H1B 109.2 . . ? 
H1A N1 H1B 107.9 . . ? 
C2 N2 La1 118.7(4) . . ? 
C2 N2 H2A 107.7 . . ? 
La1 N2 H2A 107.7 . . ? 
C2 N2 H2B 107.7 . . ? 
La1 N2 H2B 107.7 . . ? 
H2A N2 H2B 107.1 . . ? 
N1 C1 C2 109.1(5) . . ? 
N1 C1 H1C 109.9 . . ? 
C2 C1 H1C 109.9 . . ? 
N1 C1 H1D 109.9 . . ? 
C2 C1 H1D 109.9 . . ? 
H1C C1 H1D 108.3 . . ? 
N2 C2 C1 109.9(5) . . ? 
N2 C2 H2C 109.7 . . ? 
C1 C2 H2C 109.7 . . ? 
N2 C2 H2D 109.7 . . ? 
C1 C2 H2D 109.7 . . ? 
H2C C2 H2D 108.2 . . ? 
C3 N3 La1 112.8(3) . . ? 
C3 N3 H3A 109.0 . . ? 
La1 N3 H3A 109.0 . . ? 
C3 N3 H3B 109.0 . . ? 
La1 N3 H3B 109.0 . . ? 
H3A N3 H3B 107.8 . . ? 
C4 N4 La1 115.1(3) . . ? 
C4 N4 H4A 108.5 . . ? 
La1 N4 H4A 108.5 . . ? 
C4 N4 H4B 108.5 . . ? 
La1 N4 H4B 108.5 . . ? 
H4A N4 H4B 107.5 . . ? 
N3 C3 C4 112.0(5) . . ? 
N3 C3 H3C 109.2 . . ? 
C4 C3 H3C 109.2 . . ? 
N3 C3 H3D 109.2 . . ? 
C4 C3 H3D 109.2 . . ? 
H3C C3 H3D 107.9 . . ? 
N4 C4 C3 110.3(5) . . ? 
N4 C4 H4C 109.6 . . ? 
C3 C4 H4C 109.6 . . ? 
N4 C4 H4D 109.6 . . ? 
C3 C4 H4D 109.6 . . ? 
H4C C4 H4D 108.1 . . ? 
C5 N5 La1 116.4(4) . . ? 
C5 N5 H5A 108.2 . . ? 
La1 N5 H5A 108.2 . . ? 
C5 N5 H5B 108.2 . . ? 
La1 N5 H5B 108.2 . . ? 
H5A N5 H5B 107.3 . . ? 
C6 N6 La1 112.9(4) . . ? 
C6 N6 H6A 109.0 . . ? 
La1 N6 H6A 109.0 . . ? 
C6 N6 H6B 109.0 . . ? 
La1 N6 H6B 109.0 . . ? 
H6A N6 H6B 107.8 . . ? 
C6 C5 N5 110.4(5) . . ? 
C6 C5 H5C 109.6 . . ? 
N5 C5 H5C 109.6 . . ? 
C6 C5 H5D 109.6 . . ? 
N5 C5 H5D 109.6 . . ? 
H5C C5 H5D 108.1 . . ? 
C5 C6 N6 109.0(5) . . ? 
C5 C6 H6C 109.9 . . ? 
N6 C6 H6C 109.9 . . ? 
C5 C6 H6D 109.9 . . ? 
N6 C6 H6D 109.9 . . ? 
H6C C6 H6D 108.3 . . ? 
C7B N7 La1 116.5(6) . . ? 
C7A N7 La1 110.9(6) . . ? 
C7B N7 H7A 92.9 . . ? 
C7A N7 H7A 128.0 . . ? 
La1 N7 H7A 104.3 . . ? 
C7B N7 H7B 118.6 . . ? 
C7A N7 H7B 91.6 . . ? 
La1 N7 H7B 112.0 . . ? 
H7A N7 H7B 109.5 . . ? 
C8A N8 La1 115.2(9) . . ? 
C8B N8 La1 115.4(8) . . ? 
C8A N8 H8A 108.5 . . ? 
C8B N8 H8A 86.1 . . ? 
La1 N8 H8A 108.5 . . ? 
C8A N8 H8B 108.5 . . ? 
C8B N8 H8B 126.8 . . ? 
La1 N8 H8B 108.5 . . ? 
H8A N8 H8B 107.5 . . ? 
C8A C7A N7 107.1(11) . . ? 
C8A C7A H7C 110.3 . . ? 
N7 C7A H7C 110.3 . . ? 
C8A C7A H7D 110.3 . . ? 
N7 C7A H7D 110.3 . . ? 
H7C C7A H7D 108.5 . . ? 
N8 C8A C7A 106.7(15) . . ? 
N8 C8A H8C 110.4 . . ? 
C7A C8A H8C 110.4 . . ? 
N8 C8A H8D 110.4 . . ? 
C7A C8A H8D 110.4 . . ? 
H8C C8A H8D 108.6 . . ? 
N7 C7B C8B 106.8(11) . . ? 
N7 C7B H7G 110.4 . . ? 
C8B C7B H7G 110.4 . . ? 
N7 C7B H7H 110.4 . . ? 
C8B C7B H7H 110.4 . . ? 
H7G C7B H7H 108.6 . . ? 
N8 C8B C7B 110.4(10) . . ? 
N8 C8B H8G 109.6 . . ? 
C7B C8B H8G 109.6 . . ? 
N8 C8B H8H 109.6 . . ? 
C7B C8B H8H 109.6 . . ? 
H8G C8B H8H 108.1 . . ? 
 
loop_ 
 _geom_hbond_atom_site_label_D 
 _geom_hbond_atom_site_label_H 
 _geom_hbond_atom_site_label_A 
 _geom_hbond_distance_DH 
 _geom_hbond_distance_HA 
 _geom_hbond_distance_DA 
 _geom_hbond_angle_DHA 
 _geom_hbond_site_symmetry_A 
N5 H5A S5  0.90 2.51 3.404(5) 176.5 3_666 
N2 H2A S5  0.90 2.60 3.445(5) 155.8 3_666 
N3 H3B S1  0.90 2.73 3.577(5) 156.8 . 
N1 H1B S1  0.90 2.76 3.625(6) 160.6 4_565 
N5 H5B S1  0.90 2.62 3.418(5) 148.3 4_565 
N8 H8B S1  0.90 2.61 3.379(5) 143.7 4_565 
N3 H3A S5  0.90 2.68 3.469(5) 146.4 2_546 
N7 H7B S5  0.90 2.74 3.533(5) 147.8 2_546 
N7 H7A S4  0.90 2.89 3.646(6) 142.2 2_546 
N4 H4A S3  0.90 2.74 3.602(5) 160.4 3_566 
N6 H6A S4  0.90 2.64 3.472(5) 154.6 3_566 
N6 H6B S3  0.90 2.61 3.432(5) 152.8 3_566 
N8 H8A S4  0.90 2.85 3.652(5) 149.6 3_566 
N4 H4B S2  0.90 2.72 3.516(5) 148.3 1_455 
 
_diffrn_measured_fraction_theta_max    0.998 
_diffrn_reflns_theta_full              27.48 
_diffrn_measured_fraction_theta_full   0.998 
_refine_diff_density_max    1.154 
_refine_diff_density_min   -1.220 
_refine_diff_density_rms    0.177 

#===END
